# Supplementary material for: Structure and dynamics of the interaction of Delta and Omicron BA.1 SARS-CoV-2 variants with REGN10987 Fab reveal mechanism of antibody action
Source: PubMed Central journal article supplement — Commun Biol. 2024 Dec 24;7:1698. doi: 10.1038/s42003-024-07422-9 (PMC11668877; doi:10.1038/s42003-024-07422-9), 2024-12-24
Supplement: 42003_2024_7422_MOESM2_ESM.pdf [file 42003_2024_7422_MOESM2_ESM.pdf]

## Description of Additional Supplementary Files

1  
2  
3  
4  
5  
6  
7  
8  
9  
10  
11  
12  
13  
14  
15  
16  
17  
18  
19  
20  
21  
22

File name: Supplementary\_Data\_1

Description: Dataset 1

File name: Supplementary\_Data\_2

Description: Dataset 2

File name: Supplementary\_Movie\_1.mp4

Description: Movie with high-amplitude motions mode #0

File name: Supplementary\_Movie\_2.mp4

Description: Movie with high-amplitude motions mode #1

File name: Supplementary\_Movie\_3.mp4

Description: Movie with high-amplitude motions mode #2

File name: Supplementary\_Movie\_4.mp4

Description: Movie with high-amplitude motions mode #3
